# Supplementary material
Source: publisher figshare collection journal article supplement (https://acs.figshare.com/ndownloader/files/9380740)
Supplement: Supplementary file 1 [file 9380740]

## Supporting Information

### **A Pompon-Like RuNPs-Based Theranostic Nanocarrier System with Stable Photoacoustic Imaging Characteristic for Accurate Tumor Detection and Efficient Phototherapy Guidance**

Gengjia Chen<sup>a, †</sup>, Meng Xu<sup>a, †</sup>, Shuang Zhao<sup>a</sup>, Jing Sun<sup>a</sup>, Qianqian Yu<sup>a</sup>, Jie Liu<sup>\*, a</sup>

<sup>a</sup> Department of Chemistry, Jinan University, Guangzhou 510632, China

\* Corresponding author. Tel: +86 20 85220223. Fax: +86 20 85220223. E-mail: [tliuliu@jnu.edu.cn](mailto:tliuliu@jnu.edu.cn).

<sup>†</sup> These authors contributed equally to the work.

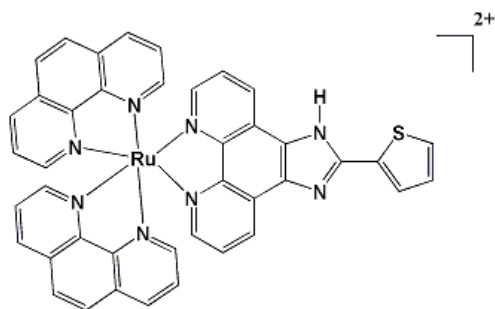

**Figure S1.** Schematic structures of  $[\text{Ru}(\text{bpy})_2(\text{tip})]^{2+}$ .

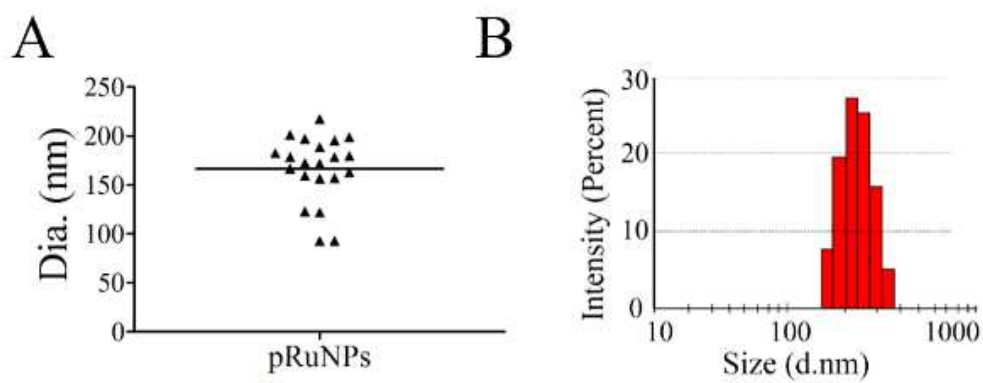

**Figure S2.** A) The quantitative analysis of the diameter of pRuNPs based on Figure 1A. B) Size distribution of pRuNPs determined by dynamic light scattering (DLS).

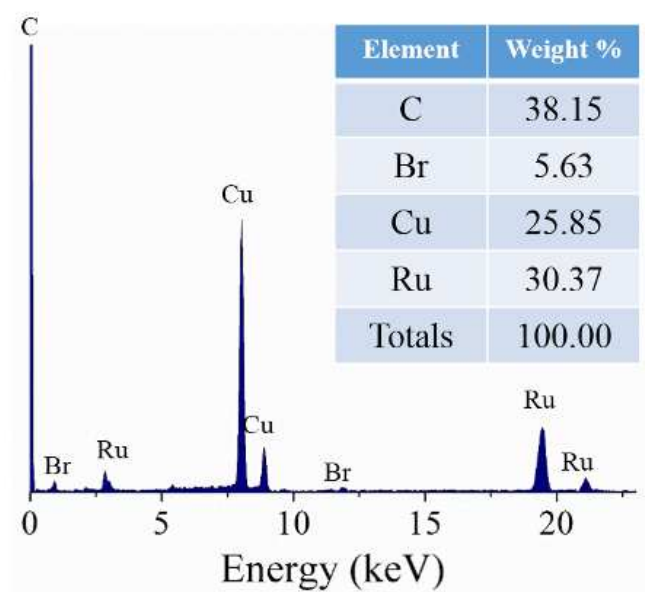

**Figure S3.** Elemental analysis of pRuNPs by energy-dispersive X-ray (EDX) spectrum.

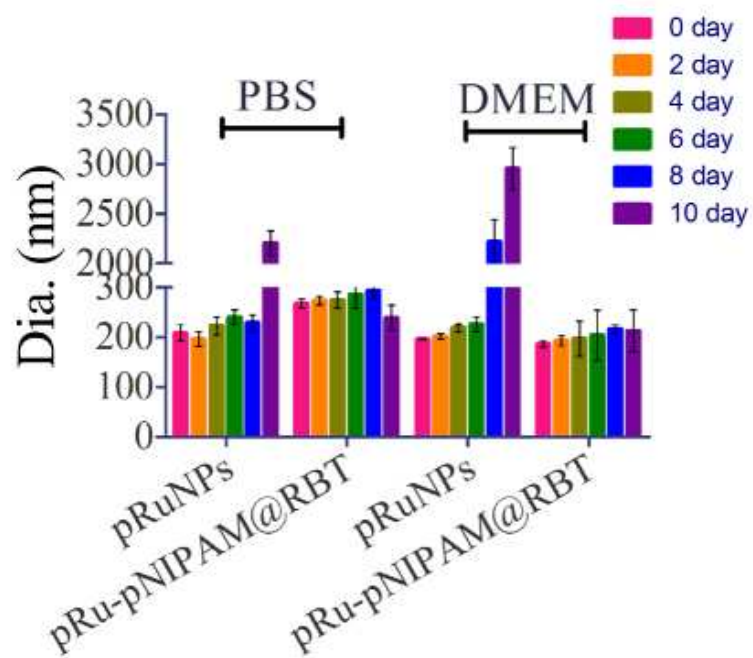

**Figure S4.** Size variations of pRuNPs and pRu-pNIPAM@RBT in PBS or DMEM for 10 days.

A

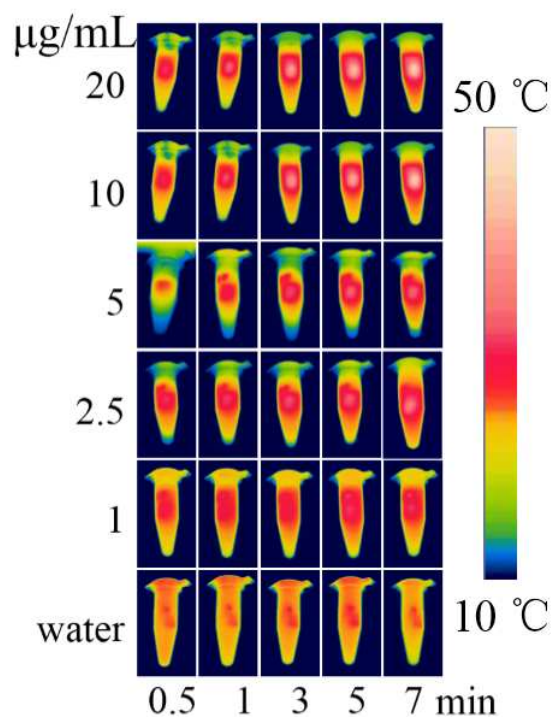

B

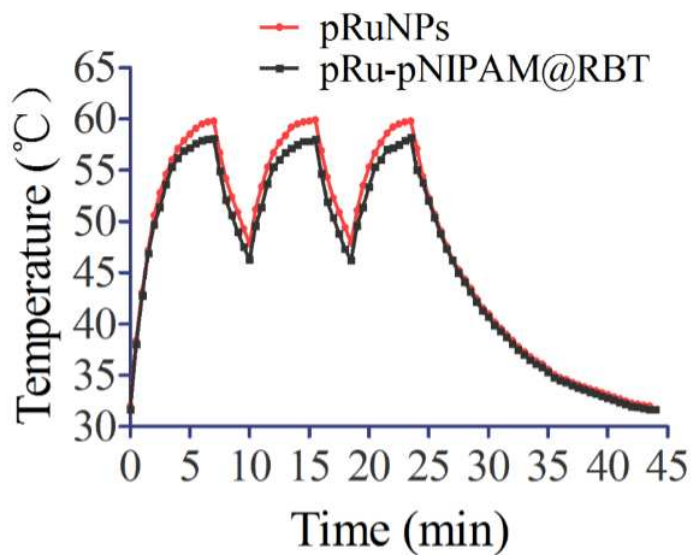

**Figure S5.** (A) IR thermal image of various concentrations of pRu-pNIPAM@RBT under 808 nm laser irradiation for 7 min. (B) The corresponding temperature-time curve of pRuNPs and pRu-pNIPAM@RBT during the continuous three-time heating-cooling cycles.

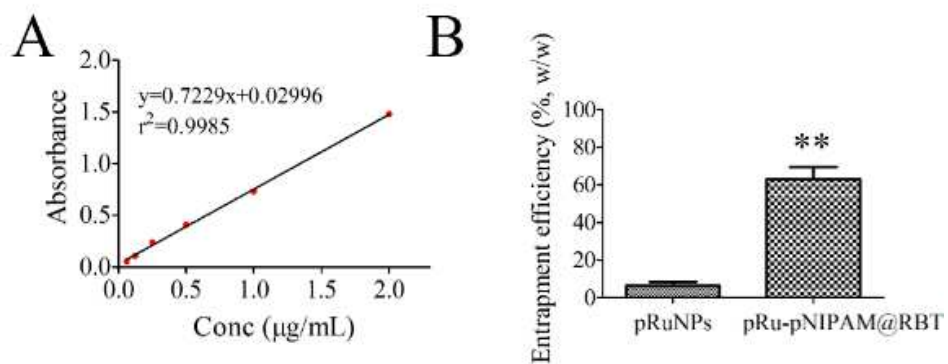

**Figure S6.** A) Corresponding linear fit between concentration of RBT and absorbance as detected by UV-vis spectra. B) Entrapment efficiency of RBT in pRuNPs and pRu-pNIPAM@RBT, respectively. \*\* $P < 0.01$ , significant difference between pRuNPs and pRu-pNIPAM@RBT group. The error bars represent the standard error of mean ( $n = 5$ ).

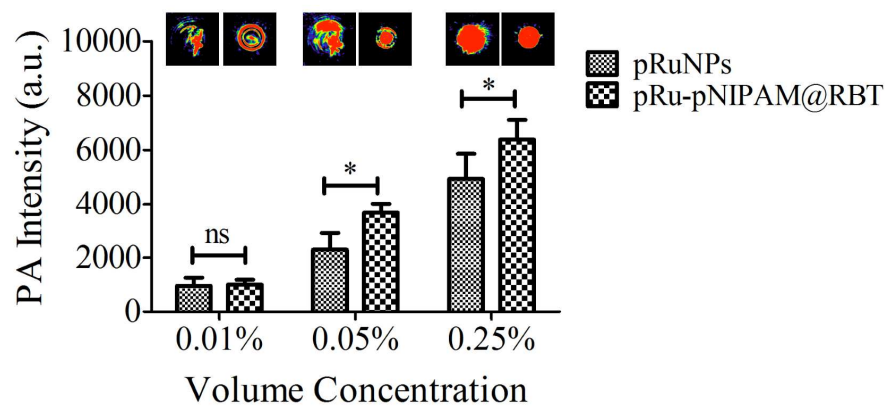

**Figure S7.** PL signal intensity of pRuNPs and pRu-pNIPAM@RBT at various volume concentrations. \* $P < 0.05$ , the error bars represent the standard error of mean ( $n = 3$ ).

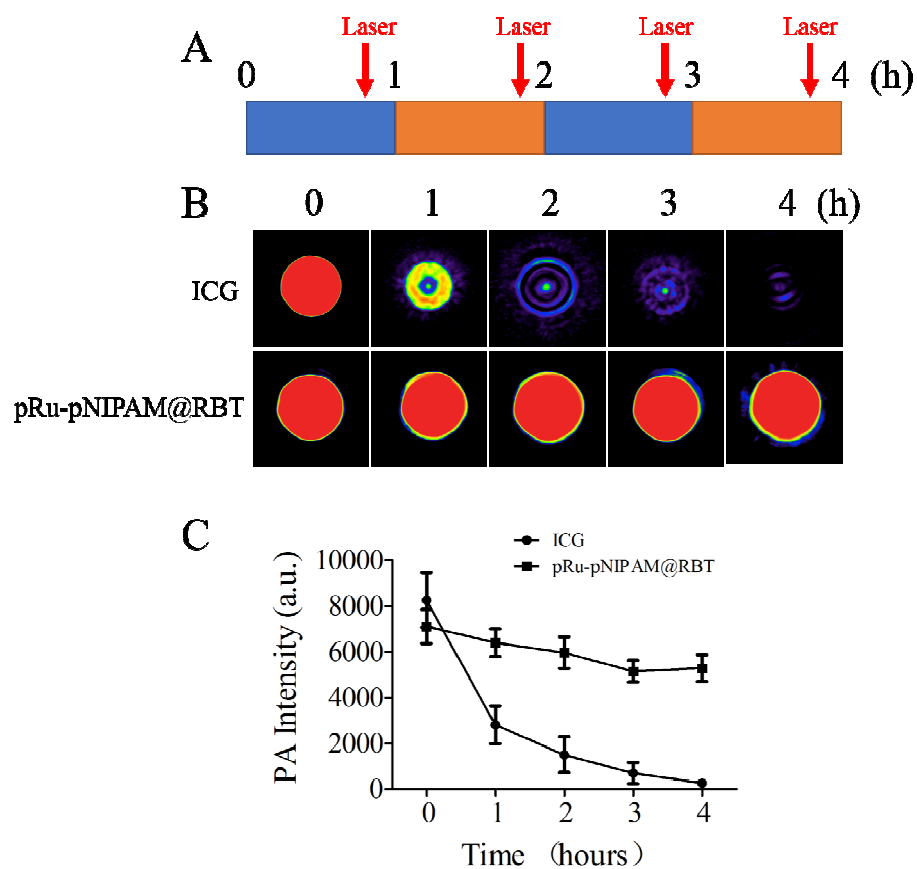

**Figure S8.** A) Schematic diagram of irradiation schedule of ICG and pRu-pNIPAM@RBT, for one minute each time. (1.0 W/cm<sup>2</sup>). B) PA imaging of ICG and pRu-pNIPAM@RBT at indicated time. C) Quantitative analysis of PA signal intensities obtained with ICG and pRu-pNIPAM@RBT.

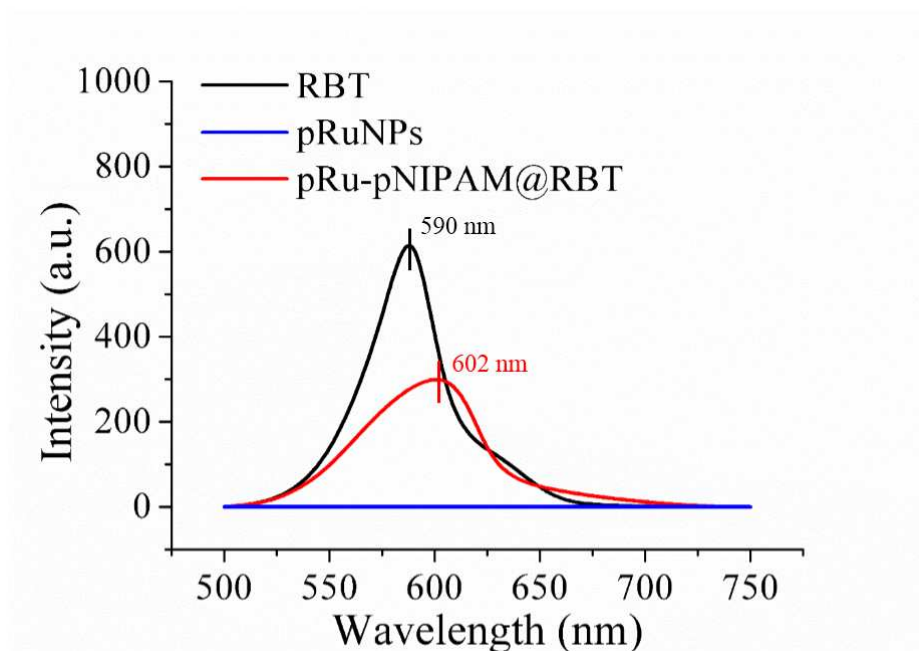

**Figure S9.** Fluorescence spectra of RBT, pRuNPs and pRu-pNIPAM@RBT acquired in aqueous solution, excitation wavelength 460 nm.

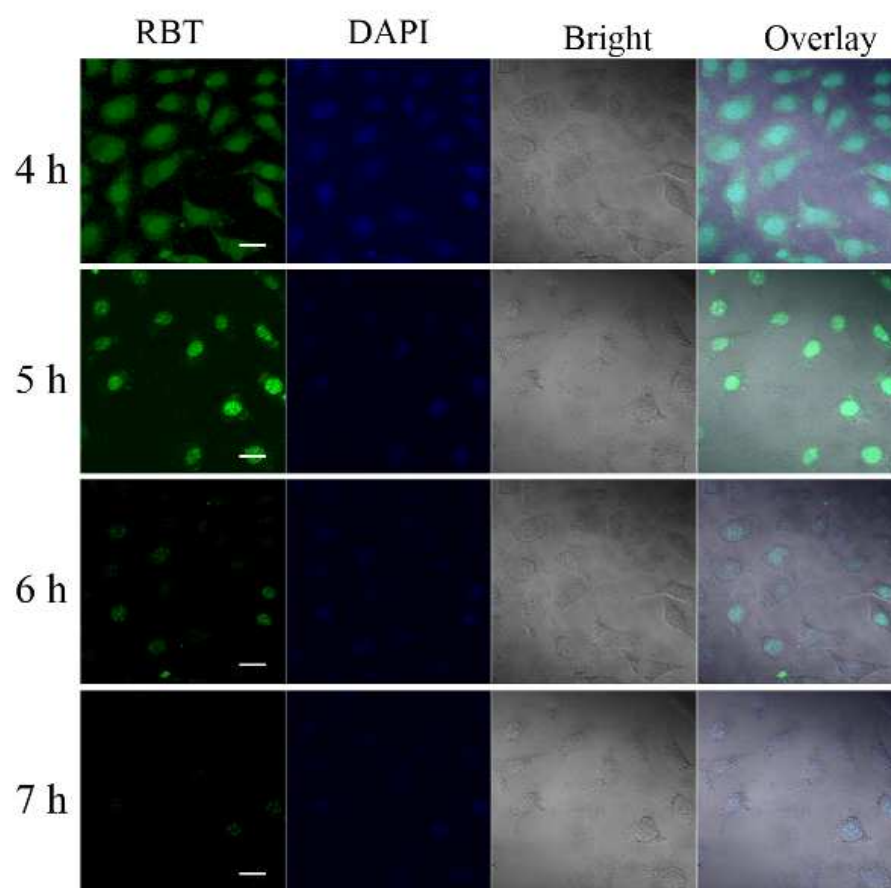

**Figure S10.** Localization of free RBT (green) and nuclei labeled by DAPI (blue). Scale bar: 25  $\mu\text{m}$ .

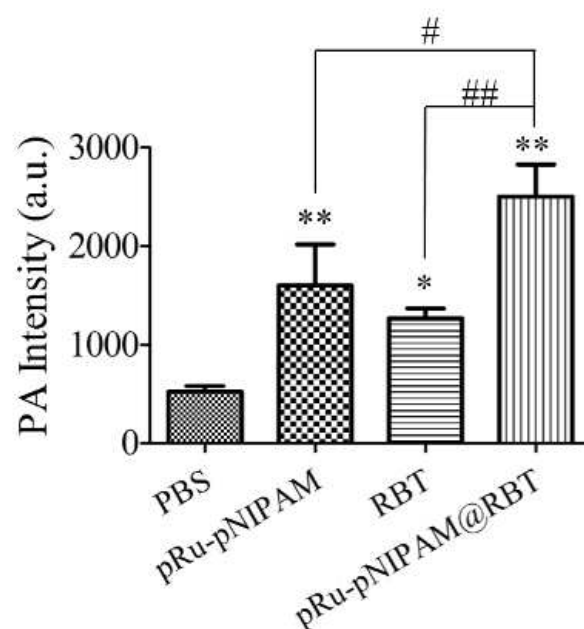

**Figure S11.** Quantitative analysis of the PA intensity of tumors based on Figure 8A. \* $P < 0.05$ , \*\* $P < 0.01$ , significant difference compared to PBS group; # $P < 0.05$ , ## $P < 0.01$ , significant difference compared to pRu-pNIPAM@RBT group. The error bars represent the standard error of mean ( $n = 5$ ).

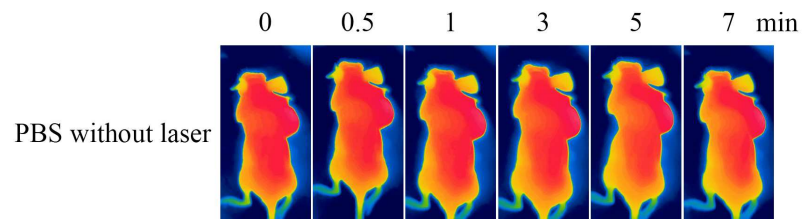

**Figure S12.** IR thermal image of tumor-bearing nude mouse after intratumorally injecting with PBS without laser irradiation.

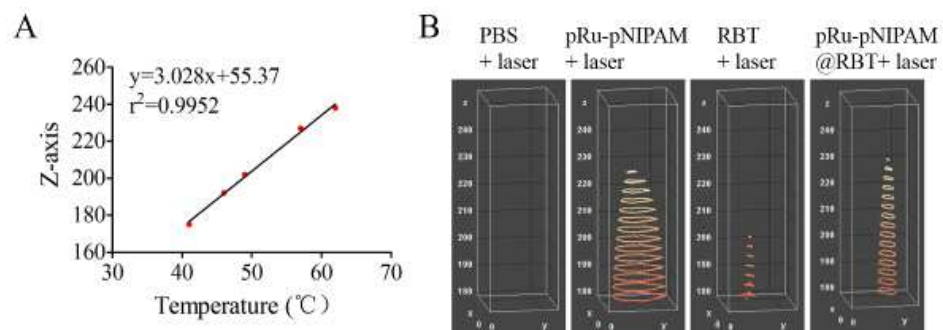

**Figure S13.** A) Corresponding linear fit between temperature and Z-axis based on Figure 9B. B) The 3D temperature distribution images above 42°C.

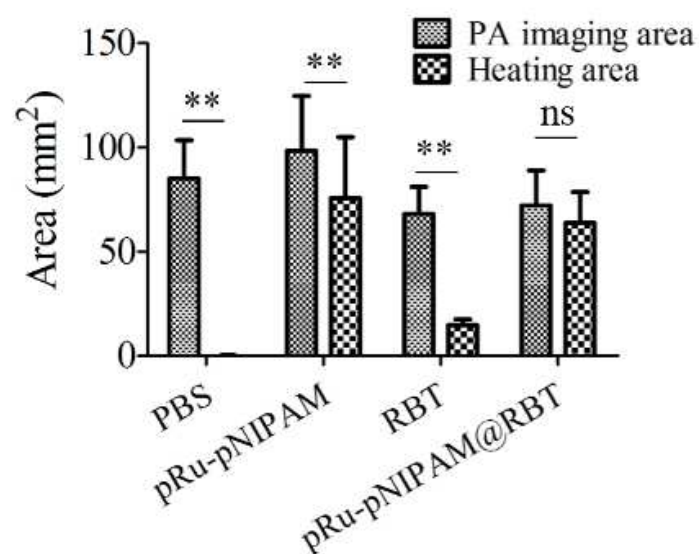

**Figure S14.** Comparison between the cross-sectional area of tumor and effective area of phototherapy based on Figure 8A and Figure 9C. \*\* $P < 0.01$ , significant difference between PA imaging area and heating area group; ns = not significant. The error bars represent the standard error of mean ( $n = 5$ ).

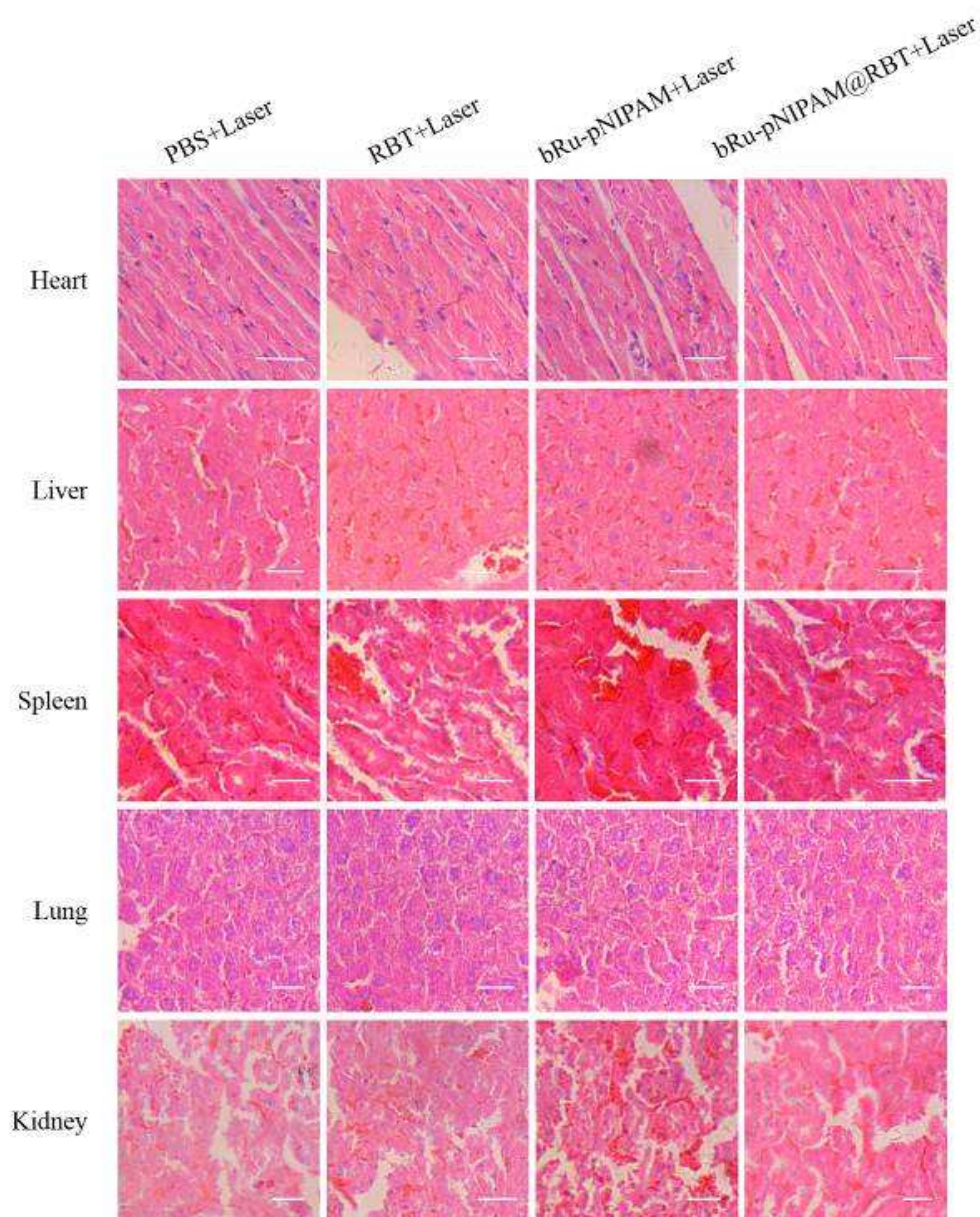

**Figure S15.** H&E images of major organs (heart, liver, spleen, lung and kidney) collected from HepG2 tumor bearing mice after different treatments for 15 days. Scare bar: 100  $\mu$ m.
